1

2 **The effect of nutrient availability on global forest carbon balance is uncertain**

3

4 Enzai Du<sup>1,2\*</sup>

5

6 1. State Key Laboratory of Earth Surface Processes and Resource Ecology, and College

7 of Resources Science & Technology, Beijing Normal University, Xijiekouwai Street

8 19#, Beijing 100875, China

9 2. Environmental Systems Analysis Group, Wageningen University, PO Box 47, 6700

10 AA Wageningen, the Netherlands

11

12 \*Corresponding author:

13 Dr. Enzai Du, Tel/Fax: 86-10-58806093, Email: [enzaidu@bnu.edu.cn](mailto:enzaidu@bnu.edu.cn)

14

15 To the Editor — Fernández-Martínez *et al.*<sup>1</sup> show a chief determinant of nutrient  
16 availability on net ecosystem production (NEP) and ecosystem carbon-use efficiency  
17 (CUEe, the ratio of NEP to gross primary production i.e. GPP) in global forests. However,  
18 their conclusions depend on an improper treatment of differences in the GPP range of  
19 nutrient-rich and nutrient-poor forests (uneven sampling effect) and outliers. A statistical  
20 re-analysis of their datasets, while *simultaneously* excluding the uneven sampling effect  
21 and outliers, indicates no significant control of nutrient availability on carbon (C) balance.

22 First, NEP and CUEe both have a non-linear relationship against GPP (Fig. 1a and 1b)  
23 and this indicates that an uneven sampling effect can result in misleading conclusions.  
24 Taking nutrient-poor forests as an example, CUEe within the GPP range of 1000~2000 g  
25 C m<sup>-2</sup> yr<sup>-1</sup> (16 ± 3%; mean ± s.e.m.) is significantly higher than that within the whole  
26 GPP range (6 ± 4%) (*t*-test, *p* < 0.05). A generalized linear model (GLM) analysis  
27 indicates that differences of GPP ranges (e.g. 1000 ~ 2 000 g C m<sup>-2</sup> yr<sup>-1</sup> vs. whole GPP  
28 range) significantly affect NEP (*p* < 0.05). Therefore, statistical analysis of Fernández-  
29 Martínez *et al.*<sup>1</sup> should have been based on a same GPP range to exclude the uneven  
30 sampling effect.

31 Second, three very young forests (< 5 years) with extremely high GPP and NEP are  
32 likely outliers, because young forests commonly have low GPP and NEP<sup>2,3</sup>. When  
33 excluding these outliers, the slope of NEP against GPP within a common GPP range  
34 (1000 ~ 2200 g C m<sup>-2</sup> yr<sup>-1</sup>) showed no significant difference (*p* = 0.49) between nutrient-  
35 rich forests (slope = 0.44, *p* < 0.05) and nutrient-poor forests (slope = 0.63, *p* < 0.001)  
36 (Fig. 1c). The slope of ecosystems respiration (Re) against GPP for nutrient-rich forests  
37 (slope = 0.56, *p* < 0.05) also showed no significant difference (*p* = 0.85) from that for

38 nutrient-poor forests (slope = 0.37,  $p < 0.05$ ) (Fig. 1d). These results indicate that  
39 nutrient-rich and nutrient-poor forests do not show significant difference in their  
40 allocation of GPP to NEP.

41 Statistical analyses by Fernández-Martínez *et al.*<sup>1</sup> have never *simultaneously* excluded  
42 the uneven sampling effect and outliers. When doing so, a GLMs analysis indicates that  
43 nutrient availability ( $p = 0.26$ ) and nutrient\*GPP interaction ( $p = 0.49$ ) both exert no  
44 significant control on NEP.

45 Moreover, I propose a non-linear conceptual model of CUEe against GPP (Fig. 1b).  
46 Youngest forests commonly show very low GPP and negative CUEe because of higher  
47  $Re$  than  $GPP^2$ , and then CUEe increases rapidly with growing GPP to a critical point  
48 which is C neutral. CUEe continues to increase but starts to slow down at a certain stage  
49 when nutrient limitation is intensified by biomass nutrient accumulation<sup>4</sup>, and further it  
50 reaches a maximum after which CUEe declines slowly due to increasing allocation of  
51 GPP to  $Re^5$ . This conceptual model implies that, instead of nutrient availability, GPP and  
52 stand age may jointly determine C allocation of GPP to NEP in global forests.

53

54 **References**

- 55 1. Fernández-Martínez, M.*et al.* Nature Clim. Change **4**, 471–476 (2014).  
56 2. Goulden, M. L. *et al.* Global Change Biol. **17**, 855–871 (2011).  
57 3. Odum, E. P. Science **164**, 262–270 (1969).  
58 4. Johnson, D.W. Ecology **87**, 64–75 (2006).  
59 5. Luyssaert, S. *et al.* Nature **455**, 213–215 (2008).

60

61 **Figure Legends**

62 Figure 1. NEP ( $\text{g C m}^{-2} \text{ yr}^{-1}$ ), CUEe, and Re ( $\text{g C m}^{-2} \text{ yr}^{-1}$ ) against GPP ( $\text{g C m}^{-2} \text{ yr}^{-1}$ ) in  
63 nutrient-rich (NR) and nutrient-poor (NP) forests. (a) Change in NEP against GPP within  
64 whole GPP range in nutrient-poor forests, (b) non-linear conceptual model of CUEe  
65 against GPP based on dataset in nutrient-poor forests, (c) comparison of the slope of NEP  
66 against GPP, and (d) comparison of the slope of Re against GPP in nutrient-rich and  
67 nutrient-poor forests.

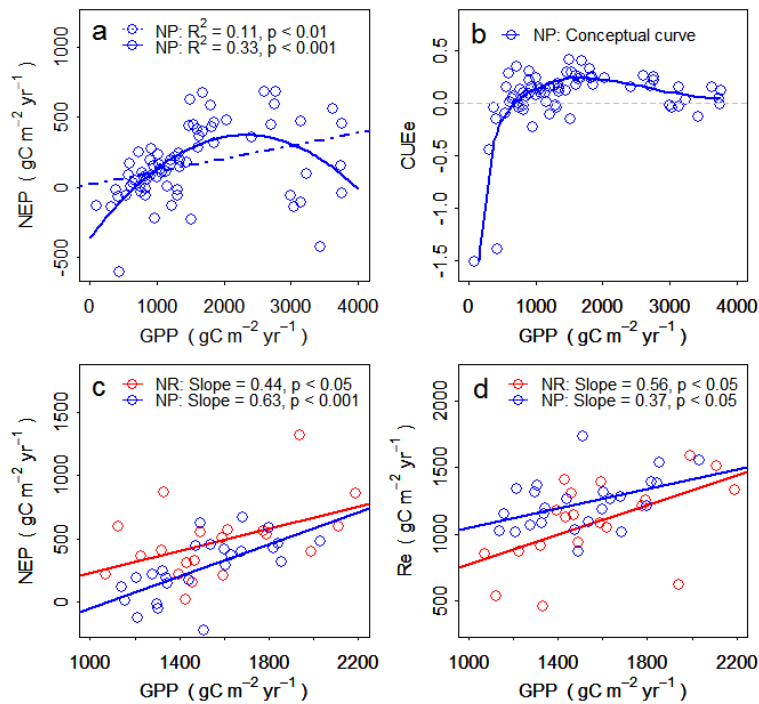

68
